# Supplementary material
Source: PubMed Central journal article supplement (PMC7870436)
Supplement: mmc1.pdf [file mmc1.pdf]

## Supplementary Information

# COVID-19 (SARS-CoV-2) outbreak monitoring using wastewater-based epidemiology in Qatar

Jayaprakash Saththasivam<sup>a,1</sup>, Shimaa S. El-Malah<sup>a,1</sup>, Tricia A Gomez<sup>a</sup>, Khadeeja Abdul Jabbar<sup>a</sup>; Reshma Remanan<sup>a</sup>, Arun K K<sup>a</sup>, Oluwaseun Ogunbiyi<sup>a</sup>, Kashif Rasool<sup>a</sup>, Sahel Ashhab<sup>a</sup>, Sergey Rashkeev<sup>a</sup>, Meryem Bensaad<sup>b</sup>, Ayeda A Ahmed<sup>b</sup>, Yasmin A Mohamoud<sup>b</sup>, Joel A Malek<sup>b</sup>, Laith J Abu Raddad<sup>c</sup>, Andrew Jeremijenko<sup>d</sup>, Hussein A Abu Halaweh<sup>e</sup>, Jenny Lawler<sup>a\*</sup> Khaled A. Mahmoud<sup>a\*</sup>

<sup>a</sup> *Qatar Environment and Energy Research Institute (QEERI), Hamad Bin Khalifa University, Qatar Foundation, P. O. Box 34110, Doha, Qatar.*

<sup>b</sup> *Genomics Laboratory, Weill Cornell Medicine-Qatar (WCM-Q), Cornell University, Doha, Qatar*

<sup>c</sup> *Infectious Disease Epidemiology Group, Weill Cornell Medicine-Qatar, Cornell University, Doha, Qatar*

<sup>d</sup> *Hamad Medical Corporation, Doha, Qatar*

<sup>e</sup> *Drainage Network Operation & Maintenance Department; Public Works Authority, Doha, Qatar*

\*Correspondence to: J Lawler [JLawler@hbku.edu.qa](mailto:JLawler@hbku.edu.qa)

\*Correspondence to: KA Mahmoud [kmahmoud@hbku.edu.qa](mailto:kmahmoud@hbku.edu.qa)

<sup>1</sup>*Contributed equally to this work.*

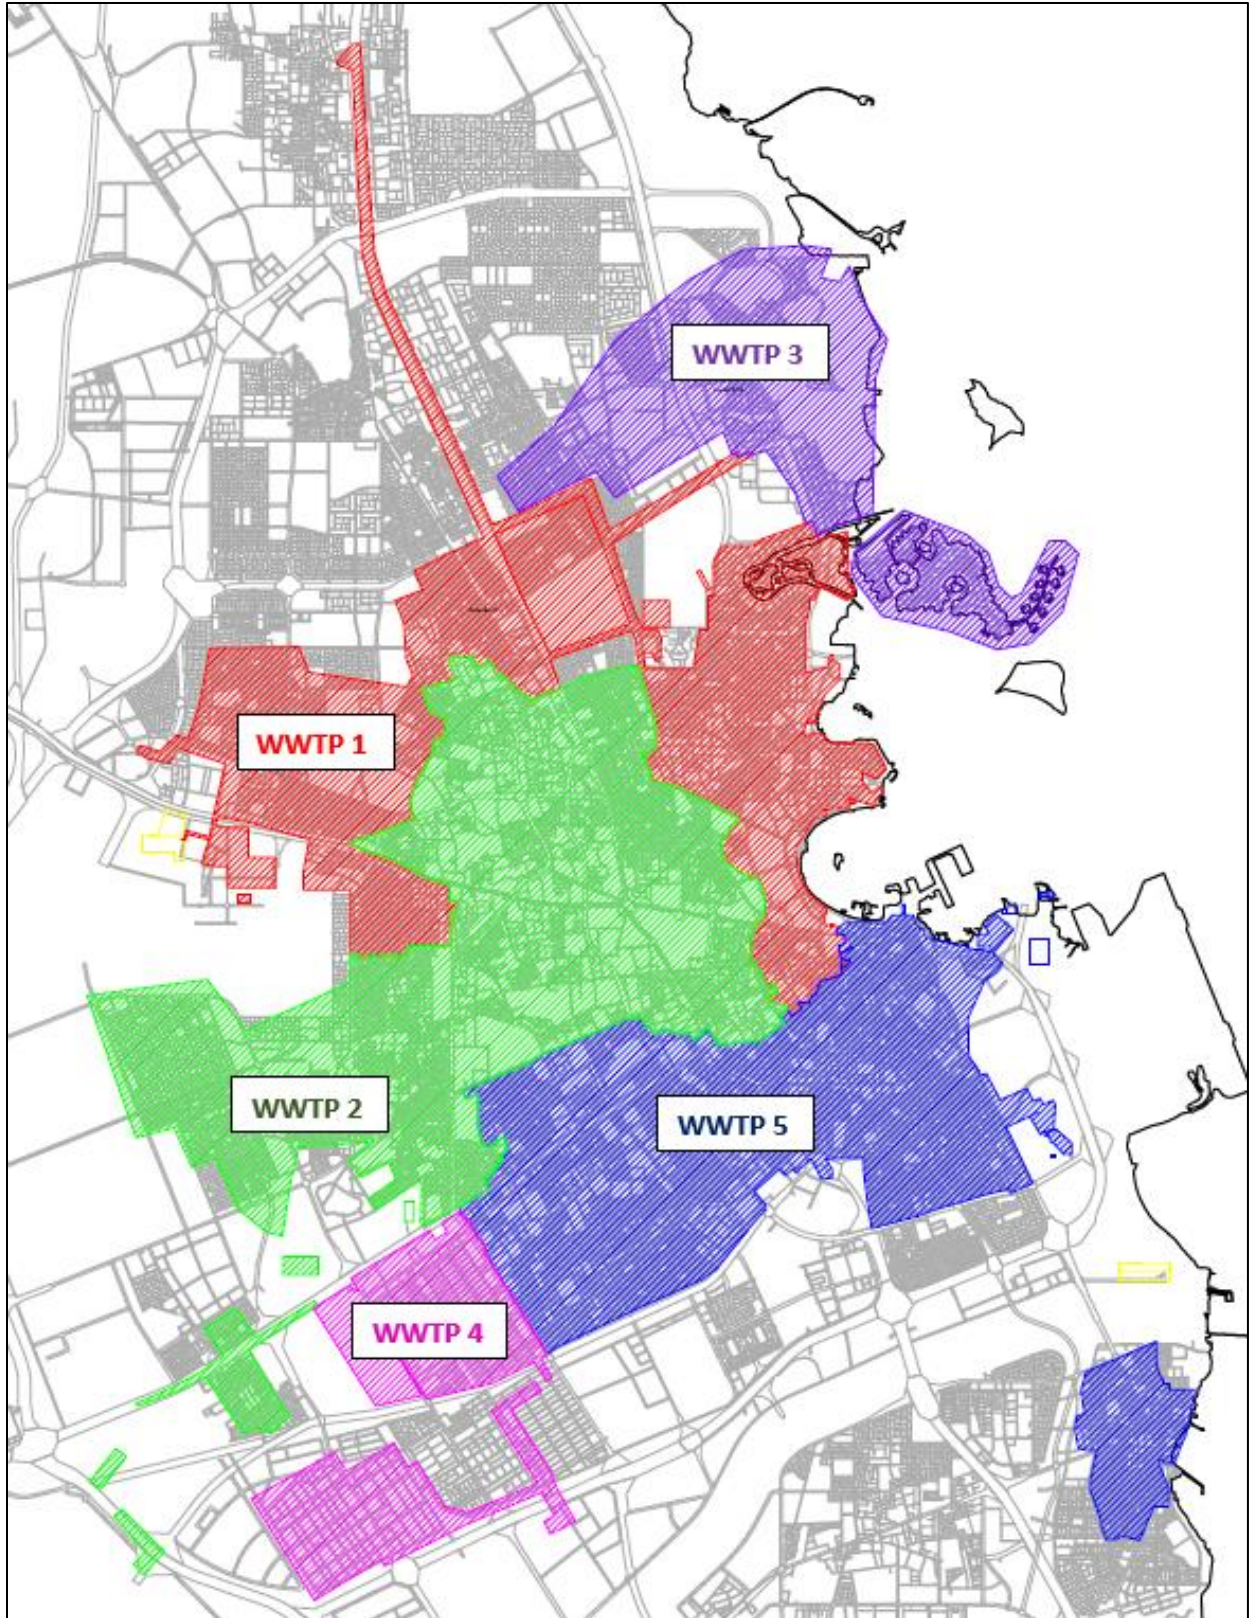

Figure S1: Locations of five major sewage treatment plants in Qatar

Table S1

## Human RNAP internal control levels across different WWTPs

| 8/7/2020  | Ct RNAP Assay | Ct N1 Assay | Ct N2 Assay | Avg (N1,N2) | Normalizing factor | N1/N2, RNAP Normalized |
|-----------|---------------|-------------|-------------|-------------|--------------------|------------------------|
| WWTP 1    | 45            | 30.2        | 30.1        | 30.15       | 1.410658307        | 21.373                 |
| WWTP 2    | 35.6          | 29.9        | 30.5        | 30.2        | 1.115987461        | 27.06123596            |
| WWTP 3    | 35.5          | 29.4        | 29.8        | 29.6        | 1.112852665        | 26.59830986            |
| WWTP 4    | 33.4          | 27.5        | 27.9        | 27.7        | 1.047021944        | 26.45598802            |
| WWTP 5    | 34.2          | 28.2        | 28.5        | 28.35       | 1.072100313        | 26.44342105            |
| 12/7/2020 | Ct RNAP Assay | Ct N1 Assay | Ct N2 Assay | Avg (N1,N2) | Normalizing factor | N1/N2, RNAP Normalized |
| WWTP 1    | 35.7          | 29.9        | 31.1        | 30.5        | 1.119122257        | 27.2535014             |
| WWTP 2    | 37            | 29.8        | 30          | 29.9        | 1.159874608        | 25.77864865            |
| WWTP 3    | 35.2          | 29.6        | 30.1        | 29.85       | 1.103448276        | 27.0515625             |
| WWTP 4    | 31.9          | 29.6        | 28.5        | 29.05       | 1                  | 29.05                  |
| WWTP 5    | 34            | 28.6        | 29.7        | 29.15       | 1.065830721        | 27.34955882            |
| 19/7/2020 | Ct RNAP Assay | Ct N1 Assay | Ct N2 Assay | Avg (N1,N2) | Normalizing factor | N1/N2, RNAP Normalized |
| WWTP 1    | 36.113243     | 31.6        | 32.1        | 31.85       | 1.132076583        | 28.25984784            |
| WWTP 2    | 34.205288     | 30.8        | 31.1        | 30.95       | 1.072266082        | 28.64689538            |
| WWTP 3    | 33.64798      | 30.2        | 30.7        | 30.45       | 1.054795611        | 28.76023799            |
| WWTP 4    | 32.25049      | 29.6        | 30.5        | 30.05       | 1.010987147        | 28.43058114            |
| WWTP 5    | 34.05516      | 29.9        | 30.6        | 30.25       | 1.067559875        | 28.93299232            |
| 26/7/2020 | Ct RNAP Assay | Ct N1 Assay | Ct N2 Assay | Avg (N1,N2) | Normalizing factor | N1/N2, RNAP Normalized |
| WWTP 1    | 45            | 32.4        | 33.3        | 32.85       | 1.410658307        | 23.287                 |
| WWTP 2    | 35.537243     | 30.7        | 31.9        | 31.3        | 1.114020157        | 28.09643956            |
| WWTP 3    | 35.80509      | 33.2        | 33.2        | 33.2        | 1.122416614        | 29.57903471            |
| WWTP 4    | 34.03934      | 31.5        | 31.7        | 31.6        | 1.06706395         | 29.61397019            |
| WWTP 5    | 32.37331      | 30.6        | 30.9        | 30.75       | 1.014837304        | 30.3004234             |

Table S2

## Estimated Infected Population

| Date      | WWTP   | Mean Flow,<br>x 10 <sup>6</sup> L/day | Mean<br>C <sub>NH4</sub> ,<br>mg/L | Estimated Total<br>Population, P | N1                         |                        | N2                         |                        |
|-----------|--------|---------------------------------------|------------------------------------|----------------------------------|----------------------------|------------------------|----------------------------|------------------------|
|           |        |                                       |                                    |                                  | C <sub>RNA</sub><br>copy/L | Infected<br>Population | C <sub>RNA</sub><br>copy/L | Infected<br>Population |
| 21/6/2020 | WWTP 1 | 145.0                                 | 12.5                               | 302131                           | 42268                      | 10855 ± 2253           | 36556                      | 9388 ± 1977            |
|           | WWTP 2 | 283.4                                 | 20.1                               | 949293                           | 542056                     | 271997 ± 51050         | 245184                     | 123030 ± 23220         |
|           | WWTP 3 | 41.7                                  | 33.9                               | 235763                           | 161877                     | 11961 ± 2461           | 293075                     | 21656 ± 4277           |
| 8/7/2020  | WWTP 1 | 133.9                                 | 9.9                                | 221016                           | 53736                      | 12746 ± 2193           | 85397                      | 20256 ± 5329           |
|           | WWTP 2 | 256.6                                 | 19.6                               | 838067                           | 74835                      | 33997 ± 2917           | 79202                      | 35981 ± 6955           |
|           | WWTP 3 | 43.9                                  | 32                                 | 234267                           | 91947                      | 7152 ± 1339            | 120100                     | 9342 ± 1968            |
|           | WWTP 4 | 62.3                                  | 21.5                               | 223392                           | 452188                     | 49919 ± 14405          | 485050                     | 53547 ± 18016          |
|           | WWTP 5 | 241.5                                 | 21.2                               | 853300                           | 242727                     | 103800 ± 11533         | 238948                     | 102184 ± 14160         |
| 12/7/2020 | WWTP 1 | 132.1                                 | 14.7                               | 323650                           | 60333                      | 14113 ± 4181           | 58933                      | 13786 ± 1744           |
|           | WWTP 2 | 286.3                                 | 19.1                               | 911423                           | 74835                      | 37941 ± 3195           | 100652                     | 51030 ± 5424           |
|           | WWTP 3 | 44.0                                  | 33.4                               | 244894                           | 82904                      | 6458 ± 1026            | 94840                      | 7388 ± 1085            |
|           | WWTP 4 | 61.8                                  | 32.6                               | 335742                           | 125170                     | 13696 ± 5827           | 206282                     | 22572 ± 8539           |
|           | WWTP 5 | 232.1                                 | 24.0                               | 928400                           | 140660                     | 57811 ± 19221          | 123779                     | 50873 ± 3945           |
| 19/7/2020 | WWTP 1 | 136.7                                 | 11.6                               | 264233                           | 22620                      | 5474 ± 999             | 24052                      | 5821 ± 1193            |
|           | WWTP 2 | 282.6                                 | 19.2                               | 904397                           | 25793                      | 12908 ± 2841           | 35810                      | 17922 ± 5968           |
|           | WWTP 3 | 44.1                                  | 30.6                               | 225058                           | 37208                      | 2908 ± 866             | 43569                      | 3405 ± 986             |
|           | WWTP 4 | 59.3                                  | 28.1                               | 277591                           | 103239                     | 10836 ± 1817           | 108080                     | 11344 ± 2300           |
|           | WWTP 5 | 199.8                                 | 19.8                               | 659340                           | 85943                      | 30407 ± 5609           | 82468                      | 29177 ± 3870           |
| 26/7/2020 | WWTP 1 | 131.5                                 | 12.3                               | 269649                           | 13499                      | 3144 ± 790             | 14980                      | 3489 ± 857             |
|           | WWTP 2 | 287.0                                 | 19.0                               | 908928                           | 42268                      | 21483 ± 4244           | 34445                      | 17507 ± 3500           |
|           | WWTP 3 | 44.3                                  | 29.5                               | 217862                           | 7889                       | 619 ± 261              | 15898                      | 1247 ± 406             |
|           | WWTP 4 | 63.5                                  | 37.7                               | 399287                           | 24703                      | 2780 ± 719             | 38796                      | 4366 ± 1026            |
|           | WWTP 5 | 217.0                                 | 16.7                               | 603983                           | 45203                      | 17370 ± 3474           | 62434                      | 23991 ± 4713           |
| 12/8/2020 | WWTP 1 | 140.7                                 | 14.3                               | 335402                           | 35737                      | 8906 ± 1886            | 47774                      | 11905 ± 2450           |
|           | WWTP 2 | 276.4                                 | 20.4                               | 939638                           | 42268                      | 20685 ± 4095           | 57106                      | 27946 ± 5453           |
|           | WWTP 3 | 44.8                                  | 25.6                               | 190942                           | 24703                      | 1958 ± 554             | 30582                      | 2423 ± 648             |
|           | WWTP 4 | 62.5                                  | 29.2                               | 303987                           | 48342                      | 5347 ± 1213            | 52232                      | 5777 ± 1295            |
|           | WWTP 5 | 217.3                                 | 19.9                               | 720712                           | 31246                      | 12023 ± 2472           | 39967                      | 15379 ± 3101           |

|           |        |       |      |        |       |              |        |              |
|-----------|--------|-------|------|--------|-------|--------------|--------|--------------|
| 16/8/2020 | WWTP 1 | 142.1 | 13.3 | 314926 | 28253 | 7108 ± 1547  | 33436  | 8412 ± 1793  |
|           | WWTP 2 | 287.8 | 20.3 | 973710 | 46747 | 23823 ± 4682 | 57106  | 29103 ± 5669 |
|           | WWTP 3 | 47.0  | 24.2 | 189668 | 49993 | 4163 ± 987   | 60605  | 5047 ± 1156  |
|           | WWTP 4 | 60.9  | 29   | 294466 | 35737 | 3855 ± 928   | 52232  | 5635 ± 1268  |
|           | WWTP 5 | 223.0 | 19.7 | 732183 | 97835 | 38633 ± 7451 | 103507 | 40873 ± 7870 |
| 23/8/2020 | WWTP 1 | 155.5 | 15.0 | 388763 | 20196 | 5561 ± 1254  | 27153  | 7477 ± 1617  |
|           | WWTP 2 | 295.9 | 19.7 | 971594 | 24703 | 12944 ± 2645 | 46374  | 24300 ± 4771 |
|           | WWTP 3 | 47.0  | 27.2 | 213180 | 30215 | 2516 ± 667   | 55432  | 4616 ± 1074  |
|           | WWTP 4 | 58.0  | 31   | 299832 | 34557 | 3551 ± 869   | 34445  | 3540 ± 867   |
|           | WWTP 5 | 230.2 | 19.4 | 744313 | 59130 | 24103 ± 4734 | 84056  | 34264 ± 6634 |
| 30/8/2020 | WWTP 1 | 136.5 | 16.0 | 364115 | 14199 | 3433 ± 846   | 34779  | 8409 ± 1793  |
|           | WWTP 2 | 286.2 | 19.8 | 944605 | 13313 | 6748 ± 1479  | 23884  | 12106 ± 2488 |
|           | WWTP 3 | 46.7  | 23.4 | 181997 | 55563 | 4591 ± 1069  | 66024  | 5456 ± 1234  |
|           | WWTP 4 | 62.7  | 32.4 | 338461 | 34581 | 3838 ± 925   | 42096  | 4672 ± 1085  |
|           | WWTP 5 | 210.3 | 20.1 | 704505 | 27573 | 10268 ± 2143 | 48155  | 17933 ± 3580 |

---

Table S3

Estimation of total infected population

| Date      | Corrected 22 days of Cumulative Daily Positive Cases* | Total Infected (N1) | Estimated** Population |
|-----------|-------------------------------------------------------|---------------------|------------------------|
| 21/6/2020 | 308,190                                               | 542,313 ± 51,159    |                        |
| 8/7/2020  | 191,990                                               | 239,646 ± 18,858    |                        |
| 12/7/2020 | 167,450                                               | 129,622 ± 20,788    |                        |
| 19/7/2020 | 147,600                                               | 73,401 ± 6,677      |                        |
| 26/7/2020 | 127,080                                               | 51,752 ± 5,594      |                        |
| 12/8/2020 | 129,810                                               | 53,731 ± 5,312      |                        |
| 16/8/2020 | 131,090                                               | 84,730 ± 9,037      |                        |
| 23/8/2020 | 117,690                                               | 50,871 ± 5,673      |                        |
| 30/8/2020 | 114,470                                               | 31,181 ± 3,081      |                        |

\* Corrected based on 10% diagnosis ratio

\*\* Mathematical model calculation based on N1 assay

## ST 1: Modeling Approach

As mentioned in the main text the central limit theorem formula explained below gave reliable results for  $N$  and  $\delta N$  for most of our data sets. In other words, the Monte-Carlo-Bayesian calculation explained in the following section were not required for most of the data sets. However, because the central limit theorem formula is derived by following the steps of the Bayesian probability theory calculation, we present this calculation first, and we then present the derivation of the central limit theorem formula in the next section.

### ST 1.1 Monte Carlo-Bayesian Approach

The calculation to infer the number of infected individuals from the measured RNA concentration is performed as follows:

In the main text, we discussed how Equation (1) could be used to give a good estimate for the infected population ( $N$ ) from the measured RNA concentration  $C_{RNA}$ . However, there is a conceptual complication with this approach. Since there are person-to-person variations in the parameters  $\alpha$  and  $\beta$ , each individual person among the  $N$  people that form the infected population has his/her individual values of  $\alpha$  and  $\beta$ . As a result, it is conceptually more natural and practically easier to calculate  $C_{RNA}$  for a given value of  $N$  rather than calculate  $N$  for a given value of  $C_{RNA}$ . When calculating  $C_{RNA}$  from  $N$ , the person-to-person variations can be introduced straightforwardly and with rigorous mathematical justification. We can use random-variable generation tools to generate a large set of  $\alpha$  and  $\beta$  values and then, assuming that  $N$  is known, choose  $N$  individual values of  $\alpha$  and  $\beta$  to calculate  $C_{RNA}$ . By repeating this random-variable based calculation many times, we can obtain the probability distribution for  $C_{RNA}$  values. In reality,  $C_{RNA}$  is measured, and the task is to infer  $N$ , or more accurately the probability distribution for possible values of  $N$  that could produce the measured value of  $C_{RNA}$ . The Bayesian approach reconciles these two opposing situations, what can be calculated easily and what needs to be calculated in reality. In this approach we first calculate  $C_{RNA}$  probability distributions for a broad range of  $N$  values and then use Bayesian analysis to extract a probability distribution for  $N$  given a certain value of  $C_{RNA}$ , which will be set to the actually measured value. As such, the Bayesian approach can be thought of as a form of reverse engineering.

To start the calculation, we first determine the range of  $N$  values that we need to consider. For this purpose, we use an approximation based on the central limit theorem, which states that for very large values of  $N$ , variations in the different variables can be ignored and  $C_{RNA}$  will be determined by the mean values of  $\alpha$ ,  $\beta$ ,  $\gamma$  and  $F$ . We can therefore obtain the initial estimate for  $N$  using the formula:

$$N_{estimate} = \frac{C_{RNA} \bar{F}}{\bar{\alpha} \bar{\beta} (1 - \bar{\gamma})}$$

Where the lines above the symbols indicate that we take the mean value of the variable. As will be explained below, this estimate might or might not be accurate depending on the widths of the different probability distributions involved. However, this estimate should generally give us the overall scale of  $N$ , and hence it helps us determine the overall scale of values that we need to consider in the Monte-Carlo calculations. For example, we can set the range of  $N$  values to be from zero to  $2N_{\text{estimate}}$ . We could then use the values  $0.1 \times N_{\text{estimate}}$ ,  $0.2 \times N_{\text{estimate}}$ ,  $0.3 \times N_{\text{estimate}}$ , ...,  $2 \times N_{\text{estimate}}$  as trial values of  $N$  in the calculation described below.

Setting  $N$  to a certain value means that we are assuming a known number of infected individuals, which is an assumption that we make in this intermediate step to be used later for inferring  $N$  from  $C_{\text{RNA}}$ . For each value of  $N$ , considering that we have a population with  $N$  infected individuals,  $C_{\text{RNA}}$  is given by

$$C_{\text{RNA}} = \frac{\sum_{i=1}^N \alpha_i \beta_i (1 - \gamma_i)}{F}$$

The index  $i$  is a counter for the number of infected individuals. Each individual has his/her own values of  $\alpha$ ,  $\beta$  and  $\gamma$ . Therefore, to generate a Monte-Carlo data point,  $N$  different values for these variables are generated randomly. The whole population produces a single value  $F$ , which also contains some randomness. Therefore, one value for  $F$  is generated randomly for one Monte-Carlo data point. If we repeat the calculation of  $C_{\text{RNA}}$  many times ( $M$  times [the number of Monte-Carlo samples]), we will obtain  $M$  different values. These values give the probability distribution of  $C_{\text{RNA}}$ , e.g. by plotting a histogram from them, for a given value of  $N$ . For example, by dividing the range of  $C_{\text{RNA}}$  values from zero to infinity into intervals of width  $\delta$ , the probability of getting a value of  $C_{\text{RNA}}$  in any of the intervals can be obtained by counting the number of Monte-Carlo data points in that range and divide it by the total number of Monte-Carlo data points. We emphasize again that the calculation of many different values of  $C_{\text{RNA}}$  is needed in this first step and that in the next step of the calculation we will use only the actual, measured value of  $C_{\text{RNA}}$ .

The calculation described so far results in a set of probability distributions: for each value of  $N$ , we obtain a distribution for  $C_{\text{RNA}}$  values. Once we have all the probability distributions, we can use Bayes' rule to obtain a probability distribution for  $N$  given a certain measured value of  $C_{\text{RNA}}$ . Ignoring uncertainty in  $C_{\text{RNA}}$ , we could choose an interval range  $\delta$  as described above and say that the probability  $P(C_{\text{RNA}}|N)$  of obtaining the value  $C_{\text{RNA}}$  (up to the uncertainty  $\delta$ ) given a value  $N$  is calculated as explained above: the number of Monte-Carlo data points in the interval divided by the total number of Monte-Carlo data points for that value of  $N$ . Bayes' rule can now be applied to find the probability  $P(N|C_{\text{RNA}})$  that the number of infected individuals is  $N$  given that the measured RNA concentration is  $C_{\text{RNA}}$ :

$$P(N|C_{\text{RNA}}) = \frac{P(C_{\text{RNA}}|N)P(N)}{P(C_{\text{RNA}})}$$



If we assume that we do not have any additional information apart from  $C_{RNA}$  to favor any value of  $N$ , then  $P(N)$  on the right-hand side is a constant. Since we know the measured value of  $C_{RNA}$ , then there is no uncertainty in its value and the denominator is 1. Bayes' rule then reduces to

$$P(N|C_{RNA}) = constant \times P(C_{RNA}|N)$$

The right-hand side, including the constant, can be determined as follows. For each value of  $N$ , we want to determine how many of the Monte-Carlo samples have a  $C_{RNA}$  value that matches the experimentally measured value. For this purpose, we choose a value of acceptable deviation and count how many Monte-Carlo samples are within this distance of the experimentally measured value. This way we obtain a number of counts for each value of  $N$ . This number of counts is proportional to  $P(C_{RNA}|N)$ , and therefore  $P(N|C_{RNA})$  will also be proportional to this number of counts. To obtain a normalized probability distribution, we add up all the counts (for all values of  $N$ ) and divide all the numbers of counted samples by this total number. Thus for every value of  $N$  we obtain a probability. This is the probability that the number of infected individuals is the corresponding value of  $N$ . (If the distance between  $N$  values is  $\Delta N$ , the probability of the value  $N$  is actually the probability that  $N$  is between  $N-\Delta N/2$  and  $N+\Delta N/2$ .)

If there is an uncertainty  $\delta C_{RNA}$  in the measurement of  $C_{RNA}$ , one can use a somewhat different formula for extracting the probability  $P(N|C_{RNA})$  from the Monte-Carlo  $C_{RNA}$  values. One can now take a sum over all the obtained values of  $C_{RNA}$ :

$$P(N|C_{RNA}) = constant \times \sum_{i=1}^M e^{-\frac{(C_{RNA,i} - C_{RNA,measured})^2}{2\delta C_{RNA}^2}}$$

The values of  $C_{RNA}$  in the Monte-Carlo ensemble that are very close to the measured value will each contribute almost 1 to the sum. Values that are within the measurement uncertainty will also make non-negligible contributions. Values in the ensemble that are very far from the measured values make very small contributions and barely affect the sum. Once the sum is obtained for each value of  $N$ , the constant is determined by the probability normalization condition, as explained above.

### ST 1.2 Central Limit Theorem

Let us go back and see if we can use the central limit theorem to avoid the long Monte-Carlo calculation described above. Specifically, let us assume that the central limit theorem gives a good approximation not only for the mean values but also for the probability distributions for  $C_{RNA}$  for any given value of  $N$ . This approximation should become good for sufficiently large values of  $N$ . In fact, according to the central limit theorem, for sufficiently large  $N$ , all the variables related to this large population should follow normal distributions, which then

simplifies all subsequent calculations. With this assumption, we can proceed by saying that the total number of RNA copies  $M_{RNA}$  will have a mean value

$$\bar{M}_{RNA} = N\bar{\alpha}\bar{\beta}(1 - \bar{\gamma})$$

And variance

$$\delta M_{RNA}^2 = N \left( (\bar{\alpha}^2 + \delta\alpha^2)(\bar{\beta}^2 + \delta\beta^2)((1 - \bar{\gamma})^2 + \delta\gamma^2) - (\bar{\alpha}\bar{\beta}(1 - \bar{\gamma}))^2 \right)$$

The RNA concentration  $C_{RNA}$  will also follow a normal distribution that is approximately centered at

$$C_{RNA} = \frac{\bar{M}_{RNA}}{\bar{F}} = \frac{N\bar{\alpha}\bar{\beta}(1 - \bar{\gamma})}{\bar{F}}$$

And having a variance that is approximately given by:

$$\delta C_{RNA}^2 = (\bar{M}_{RNA}^2 + \delta M_{RNA}^2) \left( \frac{1}{\bar{F}^2} + \frac{\delta F^2}{\bar{F}^4} \right) - \frac{\bar{M}_{RNA}^2}{\bar{F}^2}$$

The above formula for  $\delta C_{RNA}^2$  can be thought of as the intrinsic variance  $(\delta C_{RNA}^2)_{Intrinsic}$  in  $C_{RNA}$ . Another possible source for variations in  $C_{RNA}$  is the measurement uncertainty or measurement error: if the measurement of  $C_{RNA}$  has uncertainty characterized with the standard deviation  $(\delta C_{RNA}^2)_{Measurement}$ , the total variance of  $C_{RNA}$  will be given by:

$$(\delta C_{RNA}^2)_{Total} = (\delta C_{RNA}^2)_{Intrinsic} + (\delta C_{RNA}^2)_{Measurement}$$

Having obtained the mean values and variances assuming a fixed value of N, we can now use these values to estimate the standard deviation in N when Bayes' rule is applied to obtain N. When we perform this inversion procedure to estimate N, we obtain a normal distribution whose standard deviation is given by

$$\delta N = \frac{\delta C_{RNA} \bar{F}}{\bar{\alpha}\bar{\beta}(1 - \bar{\gamma})}$$

This is the central limit theorem formula for the standard deviation in N. Although evaluating it requires going through the few steps of calculating different mean values and standard deviations, these calculations are all straightforward algebraic calculations and do not require any random-variable sampling as in the Monte-Carlo approach described in the previous section. As a result, the central limit formula takes essentially no computational time, whereas the Monte-Carlo approach becomes increasingly time consuming as the size of the population N increases.
